# Supplementary material
Source: PubMed Central journal article supplement (PMC2396400)
Supplement: emboj200883s1.pdf [file emboj200883s1.pdf]

## **Supplemental Figure Legends**

### **Figure S1. *ofd1*<sup>+</sup> and *ofd2*<sup>+</sup> are Sre1N target genes.**

(A) Wild-type and *sre1Δ* cells were grown ± oxygen for 6 hr. Total RNA (5 μg) was subjected to northern analysis with the indicated <sup>32</sup>P-labeled probes. α-tubulin (*tub1*<sup>+</sup>) mRNA served as a loading control. (B) Wild-type and *ofd1Δ* cells were grown ± oxygen for 6 hr. Whole cell lysates were subjected to western blot analysis using anti-Ofd1 IgG.

### **Figure S2. *Ofd2* does not regulate Sre1N.**

*sre1N* and *sre1N ofd2Δ* cells were grown ± oxygen for 6 hr. Whole cell lysates were subjected to western blot analysis using anti-Sre1 IgG.

# Figure S1

## A Northern Blot

| Strain                | <i>WT</i> |   | <i>sre1</i> $\Delta$ |   |
|-----------------------|-----------|---|----------------------|---|
| O <sub>2</sub> (6 hr) | +         | - | +                    | - |
| Lane                  | 1         | 2 | 3                    | 4 |

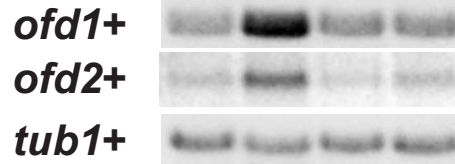

## B Western Blot

| Strain                | <i>WT</i> |   | <i>ofd1</i> $\Delta$ |   |
|-----------------------|-----------|---|----------------------|---|
| O <sub>2</sub> (6 hr) | +         | - | +                    | - |
| Lane                  | 1         | 2 | 3                    | 4 |

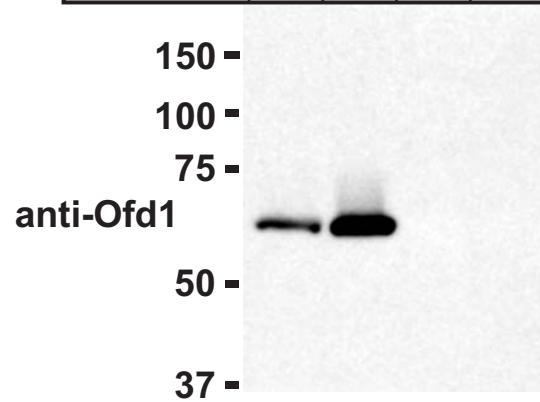

# Figure S2

## Western Blot

| Strain                | <i>sre1N</i><br><i>ofd2</i> <sup>+</sup> |   | <i>sre1N</i><br><i>ofd2</i> $\Delta$ |   |
|-----------------------|------------------------------------------|---|--------------------------------------|---|
| O <sub>2</sub> (6 hr) | +                                        | - | +                                    | - |
| Lane                  | 1                                        | 2 | 3                                    | 4 |

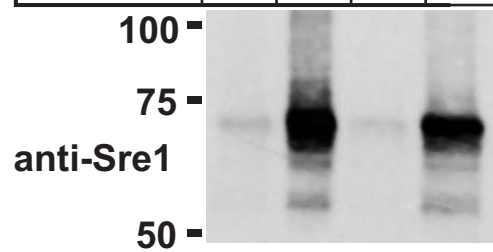

## Supplementary Table 1.

### Oligonucleotide sequences

| Strain Construction<br>Oligonucleotides | 5' → 3'                                                                                                    |
|-----------------------------------------|------------------------------------------------------------------------------------------------------------|
| <i>sre1N</i> Forward                    | AATTCAATTTCTCTTTATTGTTGGATTTTTTAACTCGCTGTTAAATTCGCTTGGT<br>TCTAGCTGGAAATTTTGTAAATATGCAAAGCTCAATTCGTC       |
| <i>sre1N</i> Reverse                    | TCATGGAAAATAATAAGGTAGTTGCAATAGATGAGCGTTGTATACTAACTGTTT<br>TCAAAGCTCGAGAATCGACAATTTATGGAGACATAAGAAAAGGTG    |
| <i>ofd1Δ::KanMX6</i> Forward            | CTATTGGGAGTTTGCCAACCACTAAAATTTTTACCTAATTGCACATTATATTCA<br>GGTGAAATCTCAAATATAAAAACGGGCGGATCCCCGGGTTAATTAA   |
| <i>ofd1Δ::KanMX6</i> Reverse            | ACAAGGGAAAACTTTCAAAAATAAGACAAAAAATTAGAGAAAAAAAATTA<br>AGTAACCCCTTTAAGTATATGTTGCCTGAATTCGAGCTCGTTTAAAC      |
| <i>ofd2Δ::KanMX6</i> Forward            | TGCTTTCTAACAAAATTTCAAAGTGAACATAGAACAGATGCTACGGATAGTTTA<br>GCAATCTTTTCGTTTCAGTTTAGAAACGGATCCCCGGGTTAATTAA   |
| <i>ofd2Δ::KanMX6</i> Reverse            | TAGTTGGCATGAAATTATTTTTTTGTGAACGACAACGAACGATTAGATATGATA<br>TTTGAAAGCCAAAAAATGCAATTACGAATTCGAGCTCGTTTAAAC    |
| <i>sre1::ura4<sup>+</sup></i> Forward   | CTTGTAACAAAATTTGATAGACTTAGTTTACAGCACACTAAATATTTATAAAA<br>TGTCTTTGATACGCCACGGAATTTTCGCCAGGGTTTTCCAGTCACGAC  |
| <i>sre1::ura4<sup>+</sup></i> Reverse   | TAAAAAATTTAAAATCGATCACCCGATAAGCAAAGTTAGGATTGCTCGAGTA<br>TGGTAATGGATGAAAGAGAAAAGTCGTAGCGGATAACAATTTACACAGGA |
| SRE2+3F                                 | AGGATAAGTAATATACAAAA                                                                                       |
| SRE2+3R                                 | ATTTAACAAAATTTCCAGCT                                                                                       |
| <b>Northern Probe Oligos</b>            |                                                                                                            |
| <i>ofd1<sup>+</sup></i> Forward         | GACGATGTTATTGGTACCAG                                                                                       |
| <i>ofd1<sup>+</sup></i> Reverse         | CATCGATGATTCGCTTAAGG                                                                                       |
| <i>ofd2<sup>+</sup></i> Forward         | TGCTAGAAGTAGATCAGGAG                                                                                       |
| <i>ofd2<sup>+</sup></i> Reverse         | AGGAATTTTCATGAAACCAGTC                                                                                     |
| <i>tub1<sup>+</sup></i> Forward         | CCATTCACGTTGGCCAAGC                                                                                        |
| <i>tub1<sup>+</sup></i> Reverse         | ATACACAGAAAATTGAAGCTTTG                                                                                    |
| <i>sre1N<sup>+</sup></i> Forward        | GGTATTCATATGATGCAAAGCTCAATTCGTC                                                                            |
| <i>sre1N<sup>+</sup></i> Reverse        | GGAATCTTAATTTGACATATCAGCTGAAGGA                                                                            |
